# Supplementary material for: Health-related quality of life and vulnerability among people with myelodysplastic syndromes: a US national study
Source: PubMed Central journal article supplement — Blood Adv. 2023 May 8;7(14):3506–15. doi: 10.1182/bloodadvances.2022009000 (PMC10362255; doi:10.1182/bloodadvances.2022009000), 2023-05-08
Supplement: BLOODA_ADV-2022-009000-mmc1.pdf [file BLOODA_ADV-2022-009000-mmc1.pdf]

**Supplemental Table 1: Description of Study Questionnaires**

| <b>Instrument</b>                                                                       | <b>Description</b>                                                                                                                                                                                                                                    | <b>Scoring</b>                                                                                                                                                                                                                                                                                                                                                                                                                                                                                                                                                                                                                                                                            | <b>Metric</b>                                                                                                                         |
|-----------------------------------------------------------------------------------------|-------------------------------------------------------------------------------------------------------------------------------------------------------------------------------------------------------------------------------------------------------|-------------------------------------------------------------------------------------------------------------------------------------------------------------------------------------------------------------------------------------------------------------------------------------------------------------------------------------------------------------------------------------------------------------------------------------------------------------------------------------------------------------------------------------------------------------------------------------------------------------------------------------------------------------------------------------------|---------------------------------------------------------------------------------------------------------------------------------------|
| Quality of Life in Myelodysplasia Scale (QUALMS)                                        | 38-item MDS-specific questionnaire <ul style="list-style-type: none"> <li>3 subscales: Physical Burden, Emotional Burden, and Benefit Finding</li> </ul>                                                                                              | <b>Mean score derived from 5-point Likert-type item-scores ranging from:</b> <ul style="list-style-type: none"> <li>0 (always) to</li> <li>5 (never)</li> </ul>                                                                                                                                                                                                                                                                                                                                                                                                                                                                                                                           | <b>QUALMS Mean Score</b><br>Range: 0-100<br><b>Higher</b> scores indicate <b>better</b> QOL                                           |
| 5-level EQ-5D (EQ-5D-5L)                                                                | 5-item health questionnaire <ul style="list-style-type: none"> <li>Describes health based on mobility, self-care, usual activities, pain, anxiety</li> <li>Single value index for self-rating of overall health status used</li> </ul>                | <b>Single value index on 100-point overall scale ranging from:</b> <ul style="list-style-type: none"> <li>0 (worse health imaginable) to</li> <li>100 (best health imaginable)</li> </ul>                                                                                                                                                                                                                                                                                                                                                                                                                                                                                                 | <b>EQ-5D-5L Single Index</b><br>Range: 0-100<br><b>Higher</b> scores indicate <b>better</b> QOL                                       |
| Patient Reported Outcomes Measurement Information System (PROMIS) Fatigue Short Form 7a | 7-item instrument <ul style="list-style-type: none"> <li>Assesses frequency of fatigue symptoms for ranges of chronic diseases</li> </ul>                                                                                                             | <b>T-Score derived from sum of 5-point Likert-type item-scores ranging from:</b> <ul style="list-style-type: none"> <li>1 (never) to</li> <li>5 (always)</li> </ul>                                                                                                                                                                                                                                                                                                                                                                                                                                                                                                                       | <b>PROMIS Fatigue T-Score</b><br>Range: 29.4-83.2<br><b>Higher</b> scores indicate <b>worse</b> QOL                                   |
| Functional Assessment of Cancer Therapy – General (FACT-G)                              | 27-item instrument <ul style="list-style-type: none"> <li>Includes physical, functional, social, and emotional well-being subscales</li> </ul>                                                                                                        | <b>Total score derived from sum of 5-point Likert-type item-scores ranging from:</b> <ul style="list-style-type: none"> <li>0 (very much) to</li> <li>4 (not at all)</li> </ul>                                                                                                                                                                                                                                                                                                                                                                                                                                                                                                           | <b>FACT-G Total Score</b><br>Range: 0-108<br><b>Higher</b> scores indicate <b>better</b> QOL                                          |
| Vulnerable Elders Survey (VES-13)                                                       | 13-item questionnaire <ul style="list-style-type: none"> <li>Designed for screening participants at risk for health deterioration</li> <li>Includes domains of age, self-rated health, and limitations in physical function and disability</li> </ul> | <b>Overall scale derived from domain-specific subscales:</b><br><u>Age (1-item):</u> <ul style="list-style-type: none"> <li>0 (&lt;75) to 3 (≥85)</li> </ul> <u>Self-rated health (1-item):</u> <ul style="list-style-type: none"> <li>0 (Excellent) to 1 (Poor or Fair)</li> </ul> <u>Difficulty with Physical Activities (6-items):</u> <ul style="list-style-type: none"> <li>0 (no difficulty) to 1 (unable to perform)</li> <li>Maximum domain score of 2</li> </ul> <u>Difficulty with Activities that Require Assistance (5-items):</u> <ul style="list-style-type: none"> <li>0 (no difficulty) to 1 (difficulty or unable to perform)</li> <li>Domain score of 0 or 4</li> </ul> | <b>VES-13 Total Score*</b><br>Range: 0-10<br><b>Higher</b> scores indicate <b>worse</b> QOL<br>*VES ≥ 3 considered Frail (Vulnerable) |

## Supplemental Table 2: Summary of Baseline Characteristics by Vulnerability Subgroup, MDS only

| Characteristic                    | Statistic                              | Vulnerable <sup>1</sup><br>(N=83) | Not Vulnerable<br>(N=165) | All<br>(N=248) | P-value |
|-----------------------------------|----------------------------------------|-----------------------------------|---------------------------|----------------|---------|
| Age                               | Mean ± SD                              | 76.6 ± 9.9                        | 69.4 ± 9.3                | 71.8 ± 10.1    | < 0.001 |
| Gender                            | Female, n(%)                           | 31 (37%)                          | 55 (33%)                  | 86 (35%)       | 0.57    |
|                                   | Male, n(%)                             | 52 (63%)                          | 110 (67%)                 | 162 (65%)      |         |
| Race                              | American Indian/Alaska Native, n(%)    | 2 (2%)                            | 0 (0%)                    | 2 (1%)         | 0.06    |
|                                   | Asian, n(%)                            | 1 (1%)                            | 0 (0%)                    | 1 (0%)         |         |
|                                   | Black, n(%)                            | 2 (2%)                            | 3 (2%)                    | 5 (2%)         |         |
|                                   | Native Hawaiian/Pacific Islander, n(%) | 0 (0%)                            | 0 (0%)                    | 0 (0%)         |         |
|                                   | White, n(%)                            | 75 (90%)                          | 160 (97%)                 | 235 (95%)      |         |
|                                   | More Than One Race, n(%)               | 0 (0%)                            | 0 (0%)                    | 0 (0%)         |         |
|                                   | Unknown/Not Reported, n(%)             | 3 (3%)                            | 2 (1%)                    | 5 (2%)         |         |
| Ethnicity                         | Hispanic or Latino, n(%)               | 3 (4%)                            | 1 (1%)                    | 4 (2%)         | 0.22    |
|                                   | Not Hispanic or Latino, n(%)           | 78 (94%)                          | 159 (96%)                 | 237 (96%)      |         |
|                                   | Unknown/Not Reported, n(%)             | 2 (2%)                            | 5 (3%)                    | 7 (3%)         |         |
| BMI                               | Mean ± SD                              | 29.9 ± 8.7                        | 28.7 ± 4.8                | 29.1 ± 6.3     | 0.17    |
| Blast %                           | Mean ± SD                              | 3.6 ± 3.6                         | 4.3 ± 5.2                 | 4.1 ± 4.7      | 0.27    |
| Hemoglobin<br>(g/dL)              | <8, n(%)                               | 17 (20%)                          | 25 (15%)                  | 42 (17%)       | 0.02    |
|                                   | 8-10, n(%)                             | 37 (45%)                          | 53 (32%)                  | 90 (36%)       |         |
|                                   | >10, n(%)                              | 29 (35%)                          | 87 (53%)                  | 116 (47%)      |         |
| Platelets<br>(10 <sup>9</sup> /L) | <50, n(%)                              | 0 (0%)                            | 0 (0%)                    | 0 (0%)         | -       |
|                                   | ≥50, n(%)                              | 83 (100%)                         | 165 (100%)                | 248 (100%)     |         |
| ANC<br>(10 <sup>6</sup> /L)       | <800, n(%)                             | 8 (10%)                           | 36 (22%)                  | 44 (18%)       | 0.03    |
|                                   | ≥800, n(%)                             | 71 (86%)                          | 127 (80%)                 | 198 (80%)      |         |
|                                   | Missing, n(%)                          | 4 (4%)                            | 2 (1%)                    | 6 (2%)         |         |
| IPSS-R                            | Very Low, n(%)                         | 15 (18%)                          | 41 (25%)                  | 56 (23%)       | 0.23    |
|                                   | Low, n(%)                              | 26 (31%)                          | 46 (28%)                  | 72 (29%)       |         |
|                                   | Intermediate, n(%)                     | 11 (13%)                          | 35 (21%)                  | 46 (19%)       |         |
|                                   | High, n(%)                             | 13 (16%)                          | 15 (9%)                   | 28 (11%)       |         |
|                                   | Very High, n(%)                        | 10 (12%)                          | 19 (12%)                  | 29 (12%)       |         |
|                                   | Not Calculated, n(%)                   | 8 (10%)                           | 9 (5%)                    | 17 (7%)        |         |

N = Number of participants in each category. Fisher's exact test used for comparing proportions of demographic factors between disease groups. An analysis of variance (ANOVA) used for comparing means of demographic factors between disease groups. SD = Standard Deviation. BMI=Body Mass Index. IPSS-R=International Prognostic Scoring System. <sup>1</sup>Vulnerable participants are those with VES-13 ≥3.

**Supplemental Table 3: Summary of Baseline HRQoL Scores by Disease Subgroup and Vulnerability Subgroup**

| QOL Measure                  | Statistic     | MDS<br>(N=248)       |                           | MDS/MPN<br>(N=40)    |                          | ICUS<br>(N=48)       |                          | AML<30%<br>(N=15)   |                          | At-Risk<br>(N=98)    |                          |
|------------------------------|---------------|----------------------|---------------------------|----------------------|--------------------------|----------------------|--------------------------|---------------------|--------------------------|----------------------|--------------------------|
|                              |               | Vulnerable<br>(N=84) | Not Vulnerable<br>(N=164) | Vulnerable<br>(N=18) | Not Vulnerable<br>(N=22) | Vulnerable<br>(N=12) | Not Vulnerable<br>(N=36) | Vulnerable<br>(N=5) | Not Vulnerable<br>(N=10) | Vulnerable<br>(N=30) | Not Vulnerable<br>(N=68) |
| QUALMS Mean Score            | Mean (95% CI) | 63.1 (60.3, 66.0)    | 73.2 (71.1, 75.2)         | 66.5 (60.4, 72.6)    | 75.0 (69.4, 80.6)        | 64.9 (57.5, 72.3)    | 76.8 (72.5, 81.2)        | 52.5 (41.0, 64.0)   | 72.6 (64.1, 81.2)        | 67.5 (62.7, 72.2)    | 75.9 (72.7, 79.2)        |
|                              | P-value       | <0.001               | -                         | 0.045                | -                        | 0.013                | -                        | 0.013               | -                        | 0.013                | -                        |
| QUALMS Physical Burden       | Mean (95% CI) | 56.5 (52.9, 60.0)    | 72.7 (70.2, 75.3)         | 58.4 (50.8, 66.0)    | 77.3 (70.3, 84.2)        | 61.4 (52.2, 70.6)    | 72.3 (66.9, 77.7)        | 45.3 (31.1, 59.6)   | 79.1 (68.4, 89.7)        | 64.0 (58.2, 69.9)    | 75.8 (71.8, 79.8)        |
|                              | P-value       | <0.001               | -                         | 0.001                | -                        | 0.045                | -                        | <0.001              | -                        | 0.003                | -                        |
| QUALMS Benefit Finding       | Mean (95% CI) | 58.4 (52.9, 63.9)    | 59.5 (55.5, 63.5)         | 58.0 (46.2, 69.8)    | 55.1 (44.3, 66.0)        | 58.3 (44.0, 72.6)    | 59.3 (50.9, 67.7)        | 56.6 (34.4, 78.8)   | 54.6 (38.1, 71.1)        | 53.4 (44.3, 62.5)    | 54.3 (48.1, 60.5)        |
|                              | P-value       | 0.909                | -                         | 0.909                | -                        | 0.909                | -                        | 0.909               | -                        | 0.909                | -                        |
| QUALMS Emotional             | Mean (95% CI) | 67.7 (63.7, 71.8)    | 72.8 (69.9, 75.7)         | 72.1 (63.4, 80.7)    | 73.1 (65.2, 81.0)        | 64.6 (54.2, 75.1)    | 82.8 (76.7, 89.0)        | 58.9 (42.6, 75.1)   | 66.0 (53.9, 78.1)        | 71.5 (64.8, 78.1)    | 77.1 (72.6, 81.7)        |
|                              | P-value       | 0.202                | -                         | 0.869                | -                        | 0.017                | -                        | 0.869               | -                        | 0.518                | -                        |
| FACT-G Total Score           | Mean (95% CI) | 73.8 (70.5, 77.1)    | 85.1 (82.7, 87.5)         | 75.5 (68.3, 82.8)    | 85.6 (79.3, 91.9)        | 73.7 (64.3, 83.0)    | 88.1 (83.1, 93.2)        | 64.7 (51.5, 78.0)   | 91.3 (81.9, 100.6)       | 74.3 (68.7, 79.8)    | 86.1 (82.4, 89.9)        |
|                              | P-value       | <0.001               | -                         | 0.040                | -                        | 0.015                | -                        | 0.004               | -                        | 0.002                | -                        |
| FACT-G Physical Well-Being   | Mean (95% CI) | 19.6 (18.6, 20.6)    | 23.9 (23.2, 24.6)         | 19.4 (17.4, 21.5)    | 25.0 (23.2, 26.9)        | 20.2 (17.7, 22.7)    | 23.7 (22.3, 25.2)        | 16.5 (12.6, 20.4)   | 25.3 (22.6, 28.1)        | 20.9 (19.2, 22.5)    | 24.2 (23.2, 25.3)        |
|                              | P-value       | <0.001               | -                         | <0.001               | -                        | 0.018                | -                        | <0.001              | -                        | 0.002                | -                        |
| FACT-G Social Well-Being     | Mean (95% CI) | 22.2 (20.9, 23.4)    | 22.7 (21.8, 23.6)         | 22.7 (20.0, 25.3)    | 22.1 (19.7, 24.5)        | 18.6 (15.4, 21.9)    | 23.7 (21.8, 25.6)        | 22.4 (17.3, 27.4)   | 24.1 (20.6, 27.7)        | 19.7 (17.6, 21.8)    | 22.8 (21.4, 24.2)        |
|                              | P-value       | 0.763                | -                         | 0.763                | -                        | 0.042                | -                        | 0.763               | -                        | 0.063                | -                        |
| FACT-G Emotional Well-Being  | Mean (95% CI) | 17.3 (16.3, 18.2)    | 18.6 (17.9, 19.2)         | 17.9 (15.9, 19.9)    | 17.0 (15.3, 18.8)        | 16.6 (14.2, 19.0)    | 19.5 (18.0, 20.9)        | 12.8 (9.0, 16.5)    | 19.8 (17.2, 22.4)        | 17.1 (15.6, 18.7)    | 19.0 (17.9, 20.0)        |
|                              | P-value       | 0.104                | -                         | 0.525                | -                        | 0.104                | -                        | 0.012               | -                        | 0.104                | -                        |
| FACT-G Functional Well-Being | Mean (95% CI) | 15.0 (13.7, 16.4)    | 20.0 (19.1, 21.0)         | 15.3 (12.4, 18.1)    | 21.3 (18.8, 23.9)        | 15.9 (12.5, 19.3)    | 21.9 (19.9, 23.9)        | 12.8 (7.5, 18.1)    | 22.1 (18.3, 25.8)        | 16.3 (14.1, 18.6)    | 21.0 (19.5, 22.4)        |
|                              | P-value       | <0.001               | -                         | 0.006                | -                        | 0.006                | -                        | 0.006               | -                        | 0.003                | -                        |
| EQ-5D-5L Total Score         | Mean (95% CI) | 59.9 (55.9, 63.8)    | 75.8 (73.0, 78.6)         | 67.0 (58.5, 75.4)    | 78.6 (71.0, 86.1)        | 61.3 (51.0, 71.5)    | 79.5 (73.4, 85.5)        | 40.9 (25.0, 56.7)   | 75.8 (64.6, 87.0)        | 65.2 (58.6, 71.9)    | 77.0 (72.7, 81.4)        |
|                              | P-value       | <0.001               | -                         | 0.044                | -                        | 0.008                | -                        | 0.002               | -                        | 0.008                | -                        |
| PROMIS Fatigue Mean T-Score  | Mean (95% CI) | 56.0 (54.3, 57.6)    | 49.5 (48.3, 50.7)         | 52.7 (49.1, 56.3)    | 48.4 (45.2, 51.6)        | 55.1 (50.8, 59.5)    | 50.4 (47.9, 52.9)        | 57.1 (50.3, 63.8)   | 46.6 (41.9, 51.4)        | 53.5 (50.6, 56.3)    | 50.1 (48.2, 51.9)        |
|                              | P-value       | <0.001               | -                         | 0.079                | -                        | 0.079                | -                        | 0.054               | -                        | 0.079                | -                        |

N = Number of participants in each disease group with an observed QOL score and vulnerability data. Estimates based on ANCOVA model adjusted for age. P-values for pairwise comparisons adjusted using the Hochberg procedure. Vulnerable defined as VES-13  $\geq$  3. HRQoL=Health-related quality of life. QUALMS=Quality of Life in Myelodysplasia Scale. EQ-5D-5L=5-level EQ-5D-5L. FACT-G=Functional Assessment of Cancer Therapy – General; Patient Reported Outcomes Measurement Information System=PROMIS Short-Form Fatigue; VES-13=13-item Vulnerable Elders Survey.

**Supplemental Table 4: Summary of Baseline HRQoL Scores by IPSS-R Score in MDS or MDS/MPN Overlap**

|                                     |               | MDS or MDS/MPN Overlap by Collapsed IPSS-R Scores |                        |                             |
|-------------------------------------|---------------|---------------------------------------------------|------------------------|-----------------------------|
| QOL Measure                         | Statistic     | Very Low or Low<br>(N=149)                        | Intermediate<br>(N=54) | High or Very High<br>(N=58) |
| <b>QUALMS Mean Score</b>            | Mean (95% CI) | 71.2 (69.0, 73.5)                                 | 70.4 (66.7, 74.0)      | 66.8 (63.2, 70.3)           |
|                                     | P-value       | 0.046                                             | -                      | -                           |
| <b>QUALMS Physical Burden</b>       | Mean (95% CI) | 69.2 (66.3, 72.1)                                 | 68.8 (64.0, 73.5)      | 62.3 (57.7, 66.9)           |
|                                     | P-value       | 0.020                                             | -                      | -                           |
| <b>QUALMS Benefit Finding</b>       | Mean (95% CI) | 61.5 (57.6, 65.5)                                 | 58.8 (52.3, 65.4)      | 53.5 (47.1, 59.9)           |
|                                     | P-value       | 0.039                                             | -                      | -                           |
| <b>QUALMS Emotional</b>             | Mean (95% CI) | 71.0 (67.9, 74.2)                                 | 70.5 (65.4, 75.6)      | 71.4 (66.4, 76.3)           |
|                                     | P-value       | 0.941                                             | -                      | -                           |
| <b>FACT-G Total Score</b>           | Mean (95% CI) | 82.4 (79.7, 85.1)                                 | 82.1 (77.5, 86.6)      | 79.3 (75.0, 83.6)           |
|                                     | P-value       | 0.265                                             | -                      | -                           |
| <b>FACT-G Physical Well-Being</b>   | Mean (95% CI) | 22.7 (21.9, 23.6)                                 | 23.1 (21.8, 24.5)      | 21.4 (20.1, 22.7)           |
|                                     | P-value       | 0.149                                             | -                      | -                           |
| <b>FACT-G Social Well-Being</b>     | Mean (95% CI) | 22.7 (21.8, 23.7)                                 | 22.3 (20.7, 23.9)      | 22.3 (20.8, 23.9)           |
|                                     | P-value       | 0.628                                             | -                      | -                           |
| <b>FACT-G Emotional Well-Being</b>  | Mean (95% CI) | 18.0 (17.3, 18.7)                                 | 18.5 (17.4, 19.6)      | 18.2 (17.1, 19.3)           |
|                                     | P-value       | 0.685                                             | -                      | -                           |
| <b>FACT-G Functional Well-Being</b> | Mean (95% CI) | 18.8 (17.8, 19.9)                                 | 18.5 (16.7, 20.3)      | 17.4 (15.7, 19.1)           |
|                                     | P-value       | 0.185                                             | -                      | -                           |
| <b>EQ-5D-5L Total Score</b>         | Mean (95% CI) | 73.4 (70.2, 76.5)                                 | 72.7 (67.5, 77.8)      | 64.1 (59.1, 69.1)           |
|                                     | P-value       | 0.005                                             | -                      | -                           |
| <b>PROMIS Fatigue Mean T-Score</b>  | Mean (95% CI) | 50.9 (49.6, 52.3)                                 | 50.7 (48.5, 53.0)      | 53.3 (51.2, 55.5)           |
|                                     | P-value       | 0.100                                             | -                      | -                           |

N = Number of participants in each disease group with an observed IPSS-R score. Estimates based on ANCOVA model adjusted for age. Estimates and p-value based on linear regression of QOL score and IPSS-R score adjusted for age. HRQoL=Health-related quality of life. QUALMS=Quality of Life in Myelodysplasia Scale. EQ-5D-5L=5-level EQ-5D-5L. FACT-G=Functional Assessment of Cancer Therapy – General; Patient Reported Outcomes Measurement Information System=PROMIS Short-Form Fatigue; VES-13=13-item Vulnerable Elders Survey.

**Supplemental Table 5: Summary of Baseline HRQoL Scores by IPSS-R Score and Vulnerability Subgroups in MDS or MDS/MPN Overlap**

| MDS and MDS/MPN Overlap by Collapsed IPSS-R Scores and Vulnerability Subgroup |               |                        |                     |                          |                         |                     |                          |
|-------------------------------------------------------------------------------|---------------|------------------------|---------------------|--------------------------|-------------------------|---------------------|--------------------------|
| QOL Measure                                                                   | Statistic     | Vulnerable (N=89)      |                     |                          | Not Vulnerable (N=172)  |                     |                          |
|                                                                               |               | Very Low or Low (N=49) | Intermediate (N=16) | High or Very High (N=24) | Very Low or Low (N=100) | Intermediate (N=38) | High or Very High (N=34) |
| <b>QUALMS Mean Score</b>                                                      | Mean (95% CI) | 63.6 (59.7, 67.4)      | 63.6 (57.3, 70.0)   | 62.7 (57.6, 67.9)        | 74.7 (72.1, 77.3)       | 73.6 (69.4, 77.7)   | 70.4 (66.0, 74.8)        |
|                                                                               | P-value       | 0.639                  |                     |                          | 0.083                   |                     |                          |
| <b>QUALMS Physical Burden</b>                                                 | Mean (95% CI) | 55.8 (51.0, 60.6)      | 60.7 (52.8, 68.6)   | 54.9 (48.4, 61.3)        | 75.4 (72.2, 78.6)       | 72.8 (67.6, 77.9)   | 68.9 (63.4, 74.4)        |
|                                                                               | P-value       | 0.394                  |                     |                          | 0.020                   |                     |                          |
| <b>QUALMS Benefit Finding</b>                                                 | Mean (95% CI) | 63.7 (56.4, 71.0)      | 57.9 (46.0, 69.8)   | 52.1 (42.4, 61.8)        | 60.5 (55.6, 65.4)       | 59.2 (51.3, 67.1)   | 54.4 (45.9, 63.0)        |
|                                                                               | P-value       | 0.030                  |                     |                          | 0.287                   |                     |                          |
| <b>QUALMS Emotional</b>                                                       | Mean (95% CI) | 67.4 (61.7, 73.1)      | 62.6 (53.3, 71.9)   | 71.3 (63.7, 78.9)        | 72.7 (68.8, 76.5)       | 74.0 (67.9, 80.1)   | 71.8 (65.3, 78.3)        |
|                                                                               | P-value       | 0.406                  |                     |                          | 0.881                   |                     |                          |
| <b>FACT-G Total Score</b>                                                     | Mean (95% CI) | 71.5 (66.8, 76.3)      | 77.5 (69.8, 85.1)   | 74.7 (68.5, 80.9)        | 87.2 (84.0, 90.3)       | 84.6 (79.4, 89.8)   | 83.6 (78.3, 88.9)        |
|                                                                               | P-value       | 0.113                  |                     |                          | 0.118                   |                     |                          |
| <b>FACT-G Physical Well-Being</b>                                             | Mean (95% CI) | 18.5 (17.1, 19.8)      | 21.6 (19.3, 23.8)   | 19.3 (17.5, 21.2)        | 24.6 (23.7, 25.5)       | 24.0 (22.5, 25.5)   | 23.3 (21.7, 24.8)        |
|                                                                               | P-value       | 0.106                  |                     |                          | 0.038                   |                     |                          |
| <b>FACT-G Social Well-Being</b>                                               | Mean (95% CI) | 22.3 (20.5, 24.1)      | 22.7 (19.7, 25.6)   | 22.2 (19.8, 24.6)        | 23.0 (21.8, 24.2)       | 22.2 (20.2, 24.1)   | 22.5 (20.4, 24.5)        |
|                                                                               | P-value       | 0.895                  |                     |                          | 0.562                   |                     |                          |
| <b>FACT-G Emotional Well-Being</b>                                            | Mean (95% CI) | 16.6 (15.4, 17.8)      | 17.5 (15.5, 19.6)   | 18.6 (16.9, 20.2)        | 18.6 (17.8, 19.5)       | 19.0 (17.6, 20.4)   | 18.0 (16.6, 19.5)        |
|                                                                               | P-value       | 0.036                  |                     |                          | 0.457                   |                     |                          |
| <b>FACT-G Functional Well-Being</b>                                           | Mean (95% CI) | 14.4 (12.6, 16.3)      | 15.7 (12.7, 18.7)   | 14.6 (12.2, 17.0)        | 20.8 (19.6, 22.0)       | 20.0 (18.0, 21.9)   | 19.9 (17.8, 22.0)        |
|                                                                               | P-value       | 0.290                  |                     |                          | 0.260                   |                     |                          |
| <b>EQ-5D-5L Total Score</b>                                                   | Mean (95% CI) | 63.3 (57.8, 68.7)      | 64.0 (55.0, 73.0)   | 57.2 (49.9, 64.5)        | 77.9 (74.2, 81.5)       | 76.8 (70.9, 82.7)   | 70.1 (63.8, 76.4)        |
|                                                                               | P-value       | 0.899                  |                     |                          | 0.014                   |                     |                          |
| <b>PROMIS Fatigue Mean T-Score</b>                                            | Mean (95% CI) | 56.1 (53.8, 58.4)      | 53.8 (50.0, 57.6)   | 56.7 (53.5, 59.8)        | 48.7 (47.1, 50.2)       | 49.2 (46.7, 51.7)   | 50.4 (47.8, 53.1)        |
|                                                                               | P-value       | 0.667                  |                     |                          | 0.175                   |                     |                          |

P-values for trend tests based on separate linear regression models by vulnerability subgroup all adjusted for age.

N = Number of participants in each category with observed IPSS-R. HRQoL=Health-related quality of life.

QUALMS=Quality of Life in Myelodysplasia Scale. EQ-5D-5L=5-level EQ-5D-5L. FACT-G=Functional Assessment of Cancer Therapy – General; Patient Reported Outcomes Measurement Information System=PROMIS Short-Form

Fatigue; VES-13=13-item Vulnerable Elders Survey.

**Supplemental Figure 1: Summary of HRQoL Scores by Vulnerability Subgroup Among all Disease Subgroups**

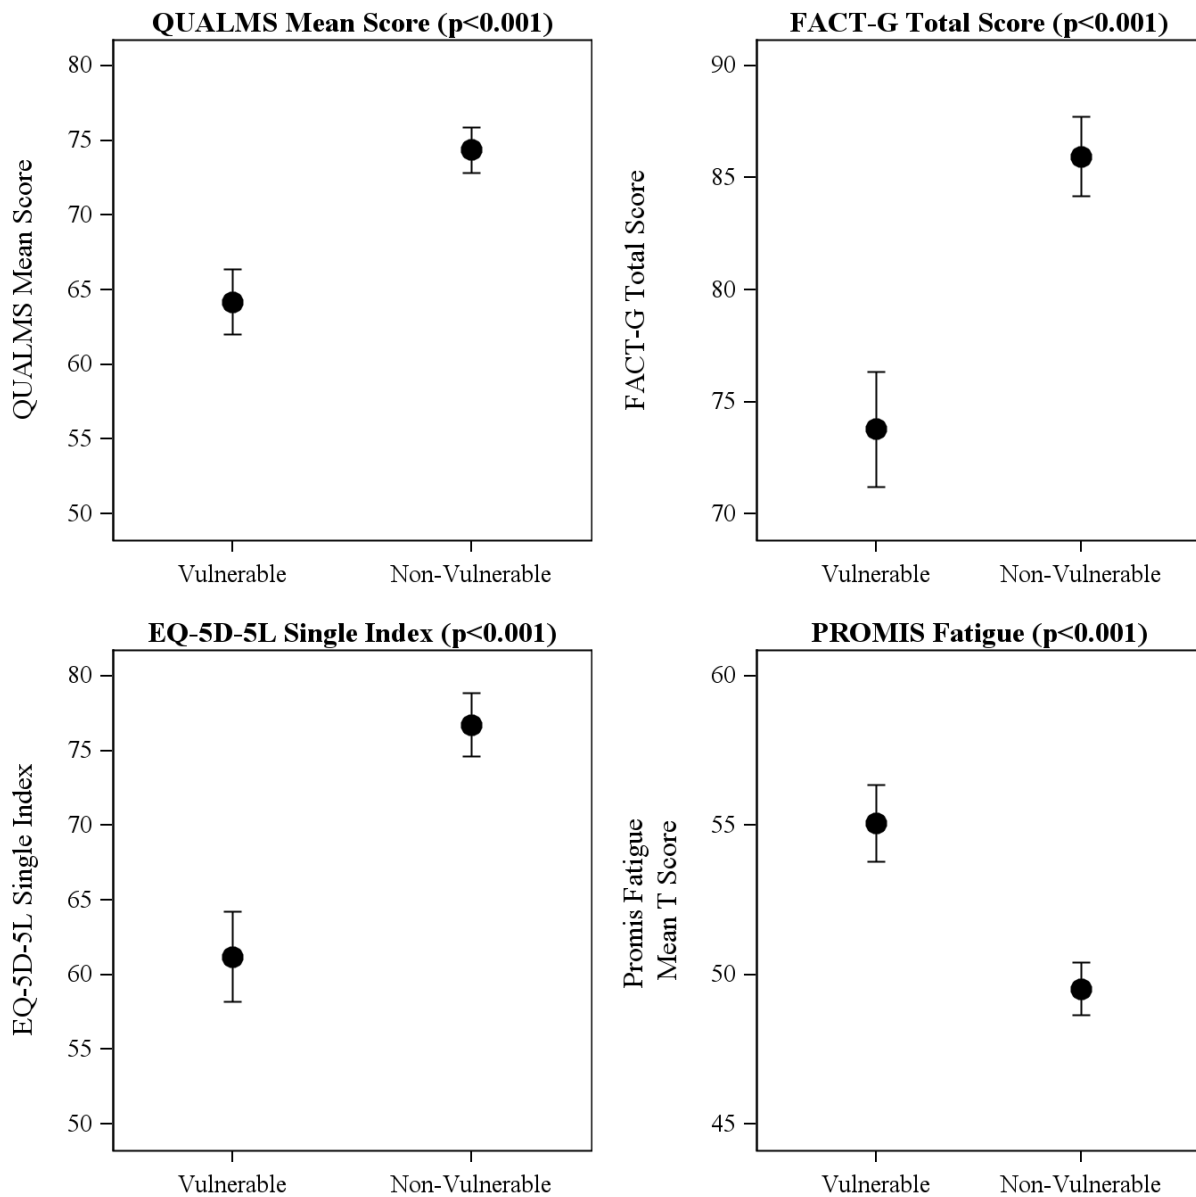

Number of participants (N) in each vulnerability subgroup pooled over all disease subgroups: Vulnerable (N=149), Non-Vulnerable (N=300).

Estimates and p-values based on ANCOVA model adjusted for age. HRQoL=Health-related quality of life.

QUALMS=Quality of Life in Myelodysplasia Scale. EQ-5D-5L=5-level EQ-5D-5L. FACT-G=Functional Assessment of Cancer Therapy – General; Patient Reported Outcomes Measurement Information System=PROMIS Short-Form Fatigue; VES-13=13-item Vulnerable Elders Survey.

### Supplemental Figure 2: Summary of QUALMS Scores by Vulnerability Subgroup Among and Disease Subgroup

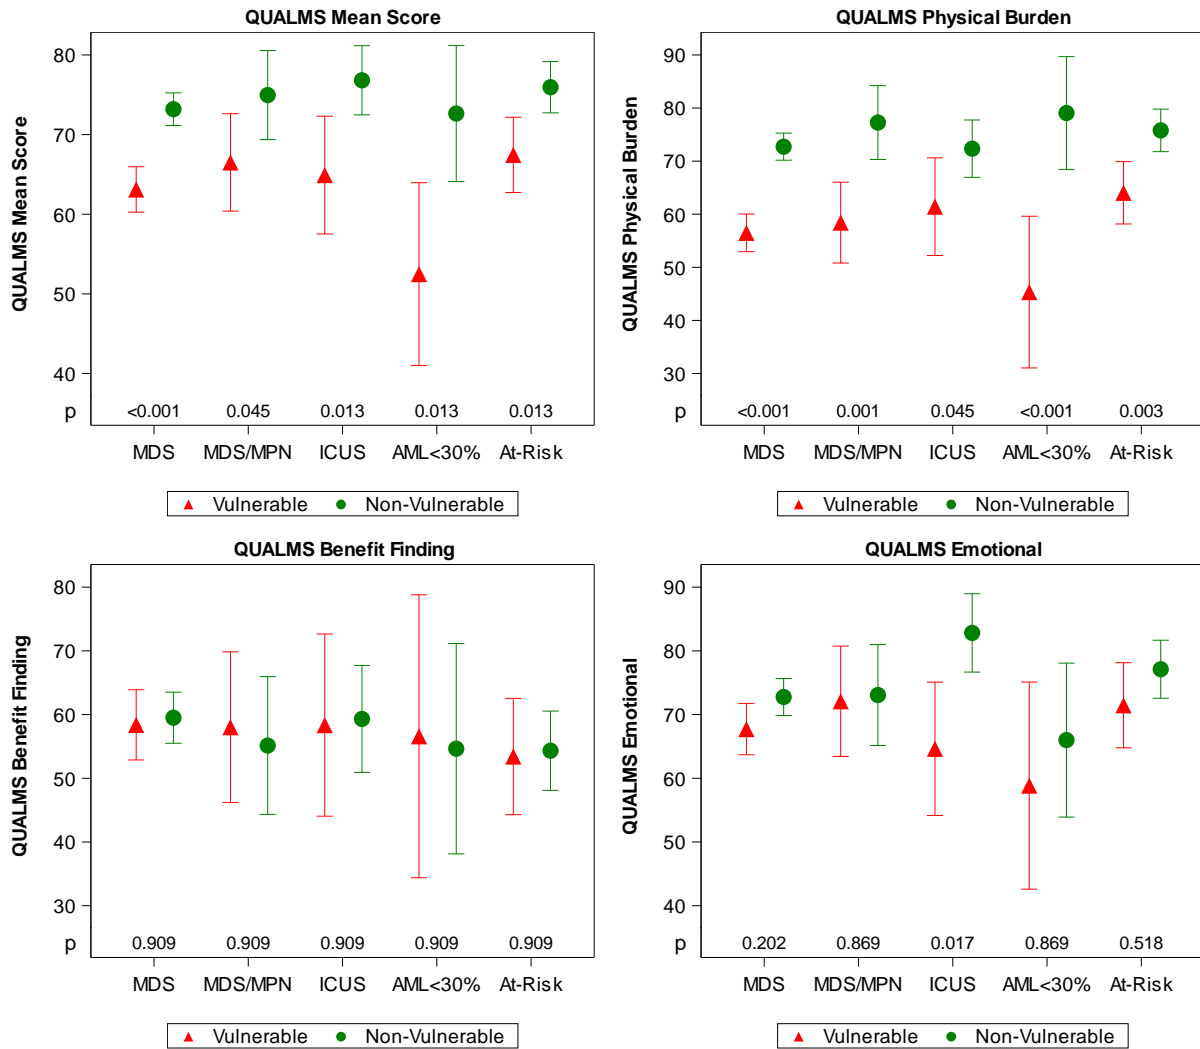

Number of participants (N) in each disease and vulnerability: Vulnerable MDS (N=84), MDS/MPN (N=18), ICUS (N=12), AML<30% (N=5), At-Risk (N=30), Non-Vulnerable MDS (N=164), MDS/MPN (N=22), ICUS (N=36), AML<30% (N=10), At-Risk (N=68). Estimates based on ANCOVA model adjusted for age. P-values for pairwise comparisons adjusted using the Hochberg procedure. Vulnerable defined as VES-13  $\geq$  3. HRQoL=Health-related quality of life. QUALMS=Quality of Life in Myelodysplasia Scale. VES-13=13-item Vulnerable Elders Survey.

**Supplemental Figure 3: Summary of FACT-G Scores by Vulnerability Subgroup Among and Disease Subgroup**

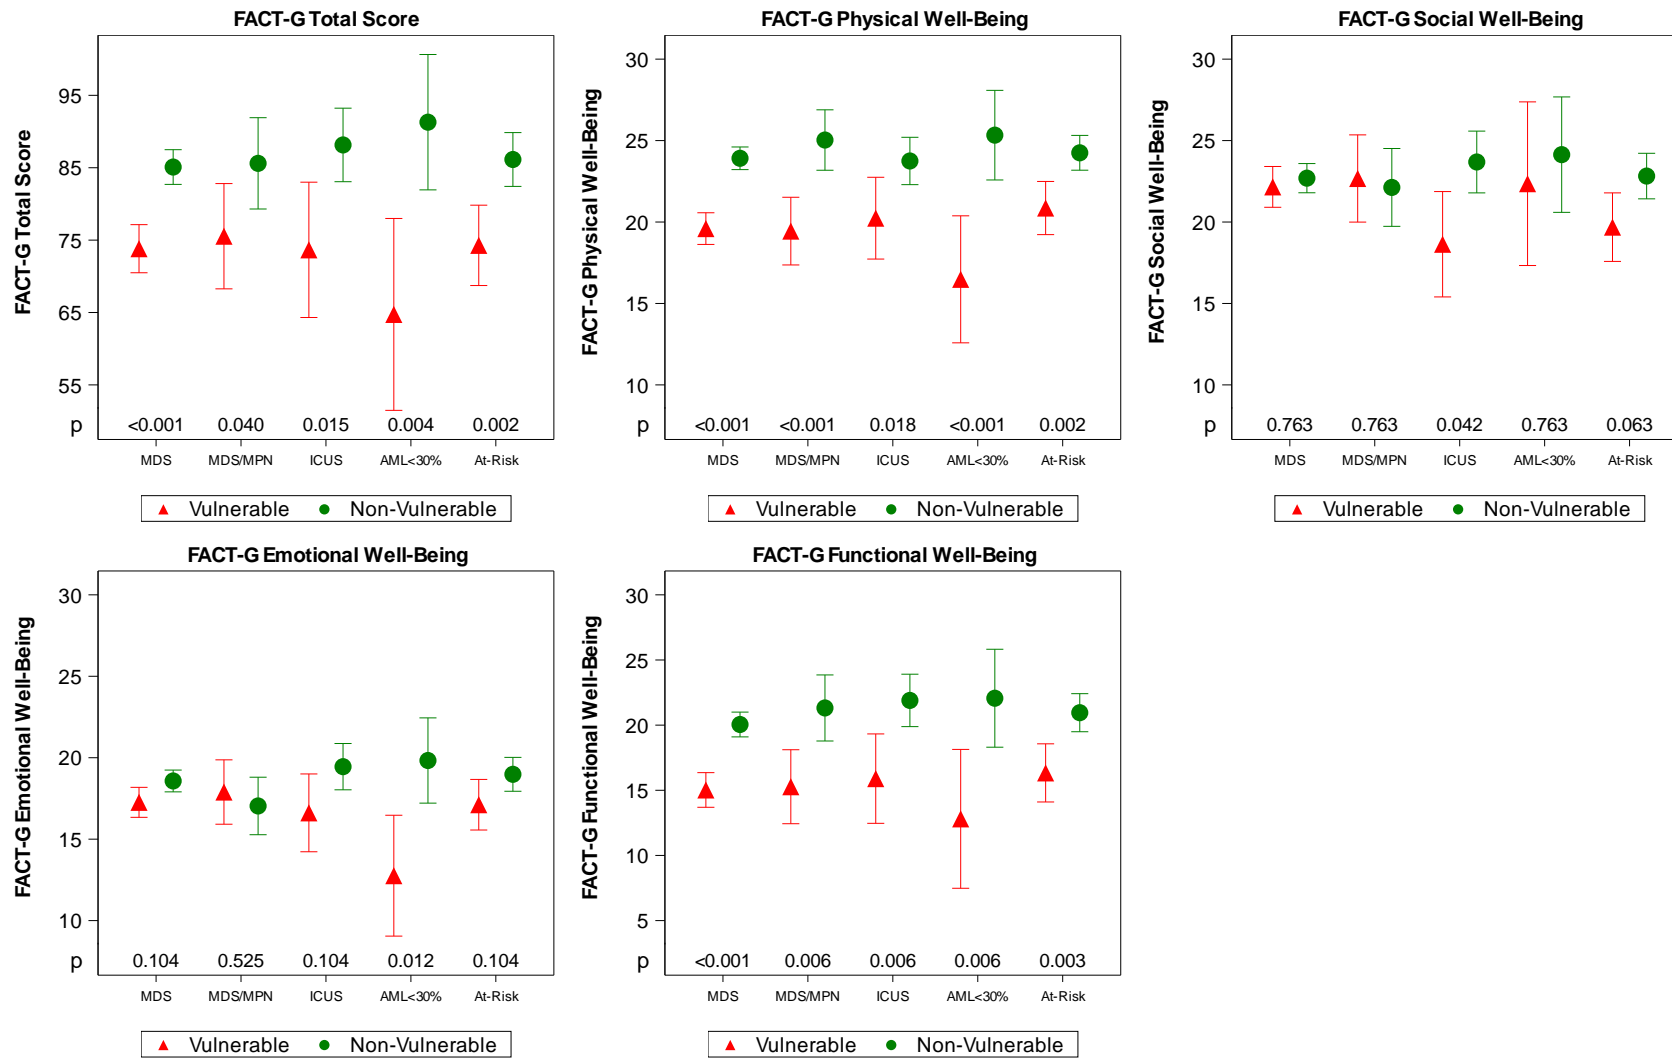

Number of participants (N) in each disease and vulnerability: Vulnerable MDS (N=84), MDS/MPN (N=18), ICUS (N=12), AML<30% (N=5), At-Risk (N=30), Non-Vulnerable MDS (N=164), MDS/MPN (N=22), ICUS (N=36), AML<30% (N=10), At-Risk (N=68). Estimates based on ANCOVA model adjusted for age. P-values for pairwise comparisons adjusted using the Hochberg procedure. Vulnerable defined as VES-13  $\geq$  3. HRQoL=Health-related quality of life. FACT-G=Functional Assessment of Cancer Therapy – General; VES-13=13-item Vulnerable Elders Survey.



**Supplemental Figure 4: Summary of QALM Scores by IPSS-R Score in MDS or MDS/MPN Overlap**

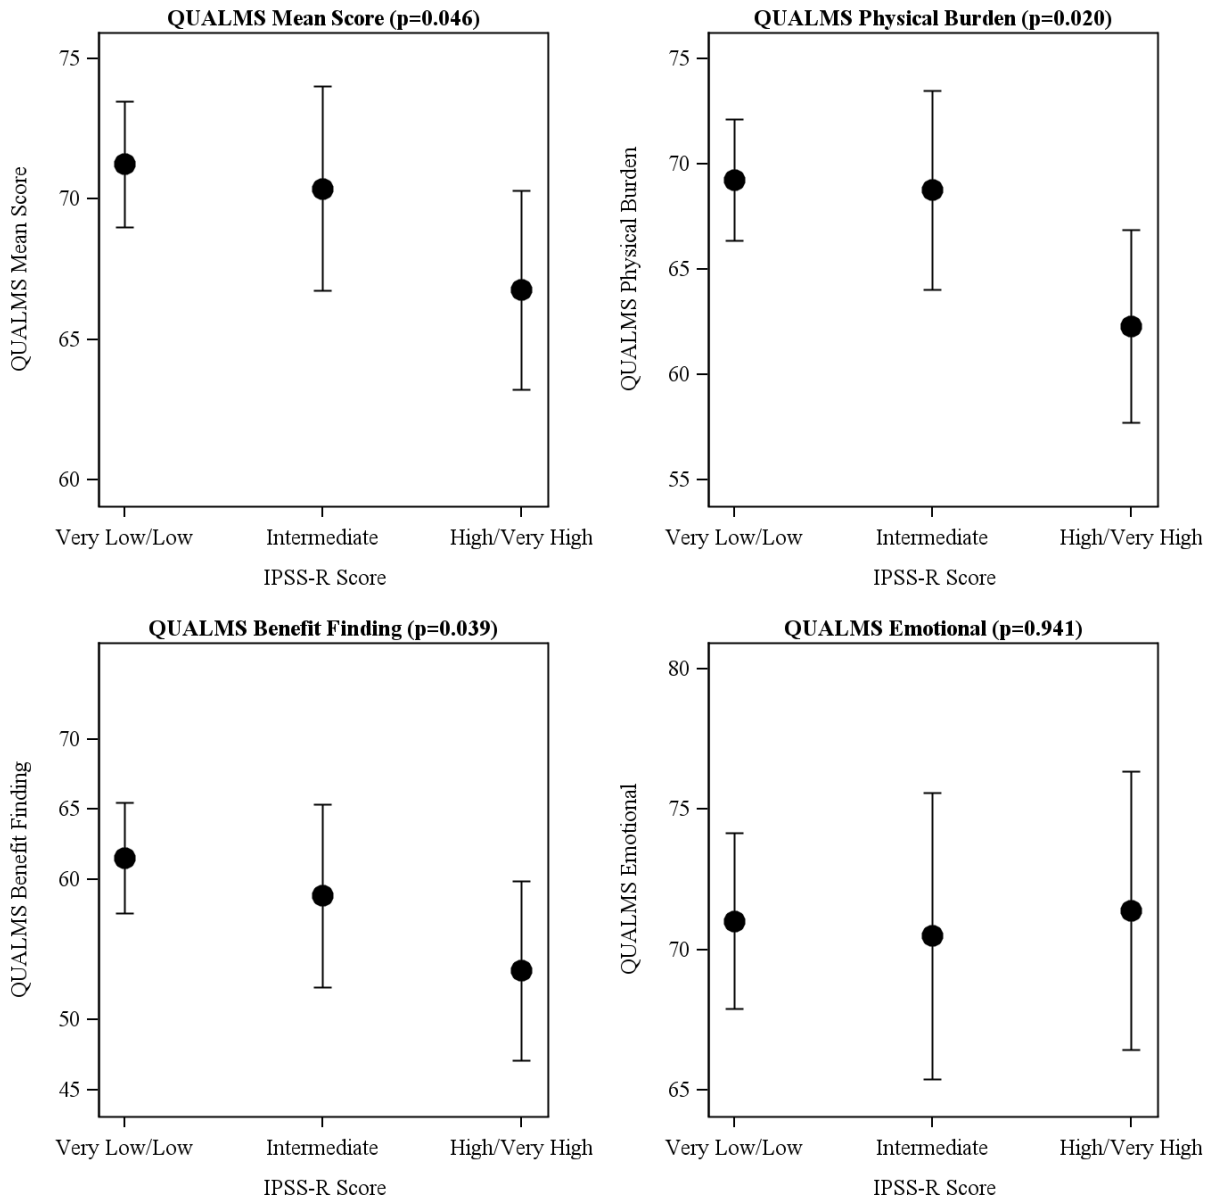

Number of participants (N) with MDS or MDS/MPN overlap in each IPSS-R Strata: Very Low/Low (N=149), Intermediate (N=54), High/Very High (N=58). Estimates based on ANCOVA model adjusted for age. Estimates and p-value based on linear regression of QoL score and IPSS-R score adjusted for age. HRQoL=Health-related quality of life. QALMS=Quality of Life in Myelodysplasia Scale.

**Supplemental Figure 5: Summary of FACT-G Scores by IPSS-R Score in MDS or MDS/MPN Overlap**

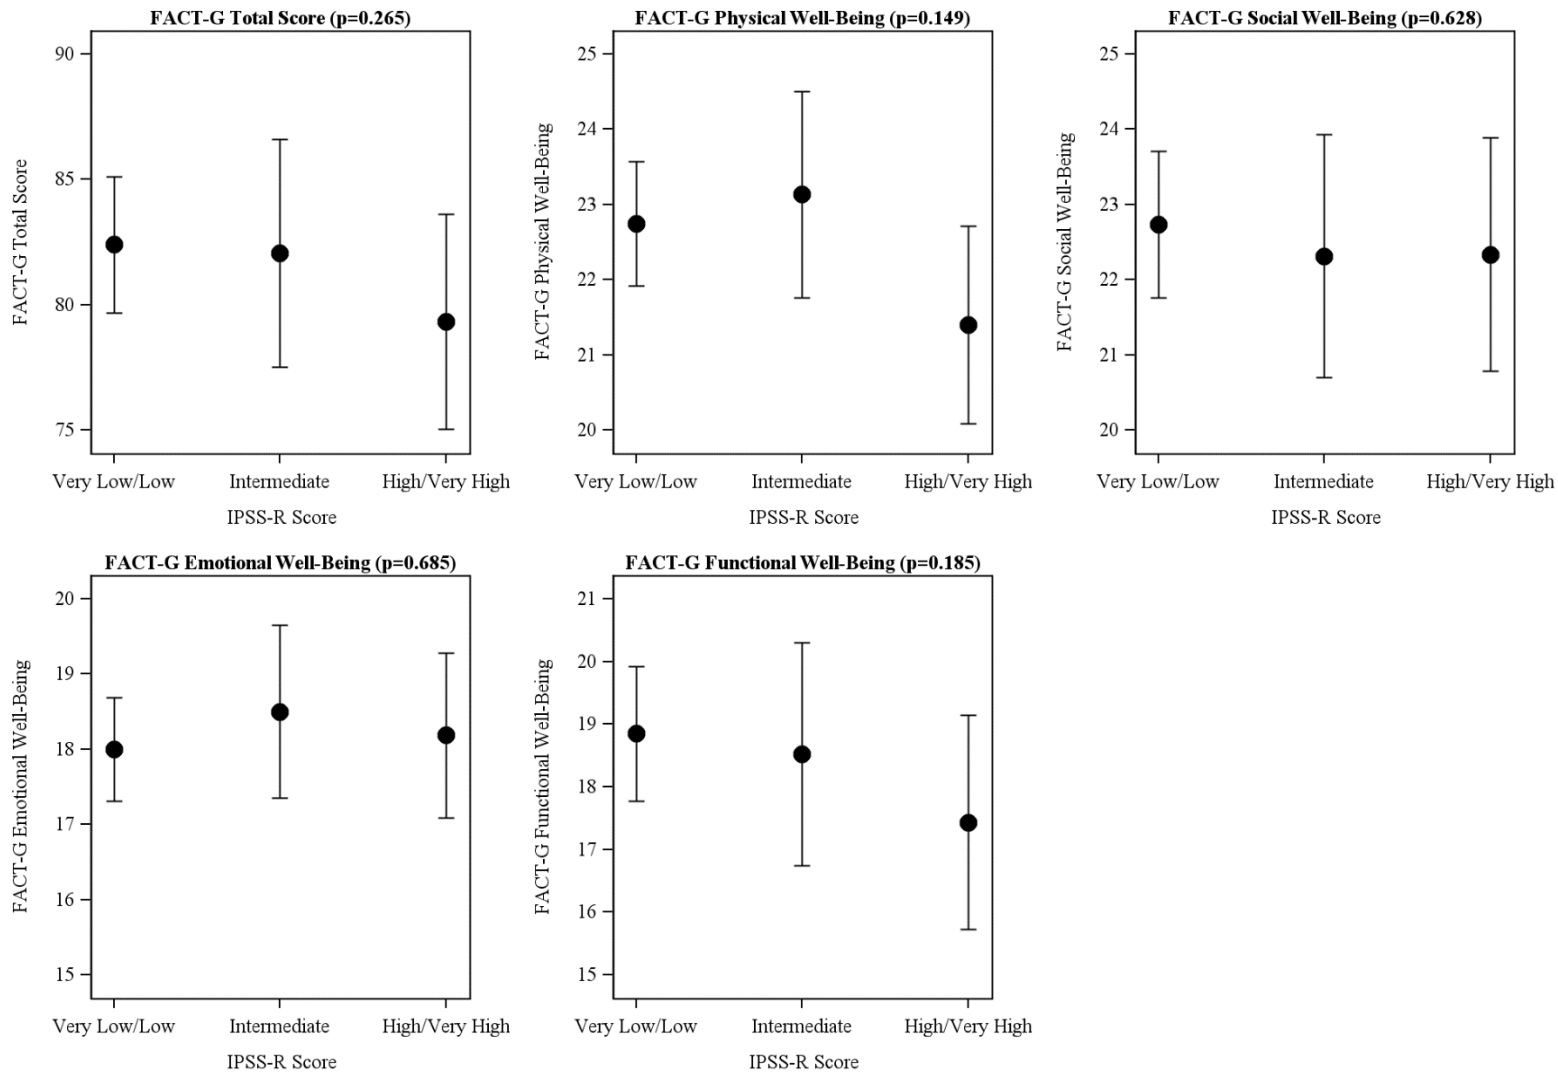

Number of participants (N) with MDS or MDS/MPN overlap in each IPSS-R Strata: Very Low/Low (N=149), Intermediate (N=54), High/Very High (N=58). Estimates based on ANCOVA model adjusted for age. Estimates and p-value based on linear regression of QoL score and IPSS-R score adjusted for age. HRQoL=Health-related quality of life. FACT-G=Functional Assessment of Cancer Therapy – General; Patient Reported Outcomes Measurement Information System=PROMIS Short-Form Fatigue; VES-13=13-item Vulnerable Elders Survey.
